# Supplementary material for: Surface modification of polyimide gate insulators for solution-processed 2,7-didecyl[1]benzothieno[3,2-b][1]benzothiophene (C10-BTBT) thin-film transistors
Source: Royal Society of Chemistry journal article supplement (doi:10.1039/c2cp43529b), 2012-11-14

**Fig. S1** Transfer characteristic curves ( $I_{ds}$  vs.  $V_{gs}$ , and  $I_{ds}^{1/2}$  vs.  $V_{gs}$ ) of the C<sub>10</sub>-BTBT TFT with a KPI gate insulator.

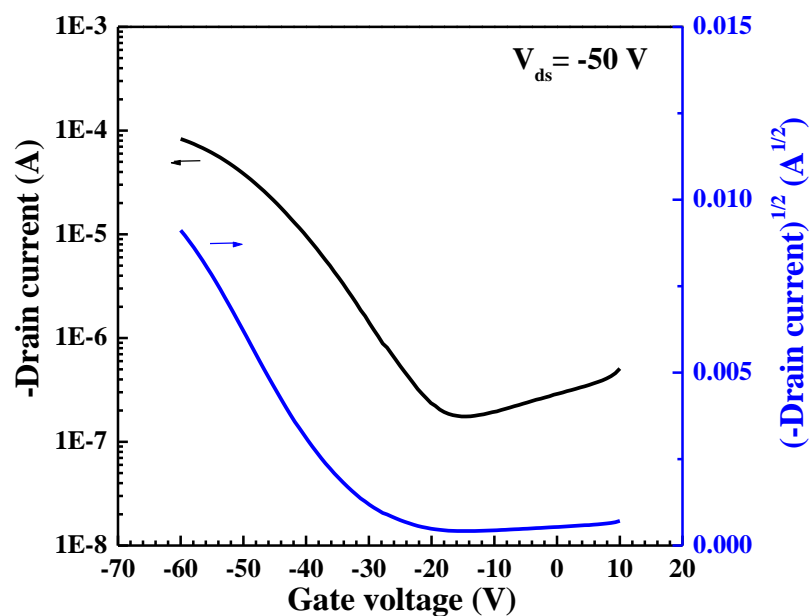

**Table S1** Electrical characteristics of the C<sub>10</sub>-BTBT TFTs with KPI and KPI-C<sub>18</sub> gate insulators

| Performance parameter [ $L/W = 50/3000$ ] <sup>a</sup> |                                         |                   |                        |                 |              |
|--------------------------------------------------------|-----------------------------------------|-------------------|------------------------|-----------------|--------------|
| Gate insulator                                         | Mobility                                | $I_{on}/I_{off}$  | $I_{off}$ (A)          | S-slope (V/Dec) | $V_{th}$ (V) |
|                                                        | ( $\text{cm}^2/\text{V}\cdot\text{s}$ ) |                   |                        |                 |              |
| KPI                                                    | 0.34                                    | $4.7 \times 10^2$ | $-1.7 \times 10^{-7}$  | 11.6            | -30.9        |
| KPI-C <sub>18</sub>                                    | 0.56                                    | $1.3 \times 10^5$ | $-3.1 \times 10^{-10}$ | 4.6             | -44.0        |

<sup>a</sup> Ratio of channel length to width.

**Fig. S2** (a) AFM image and (b) the height profile of the F<sub>4</sub>TCNQ-doped C<sub>10</sub>-BTBT layer on KPI-C<sub>18</sub>. The height profile is given for the black line.

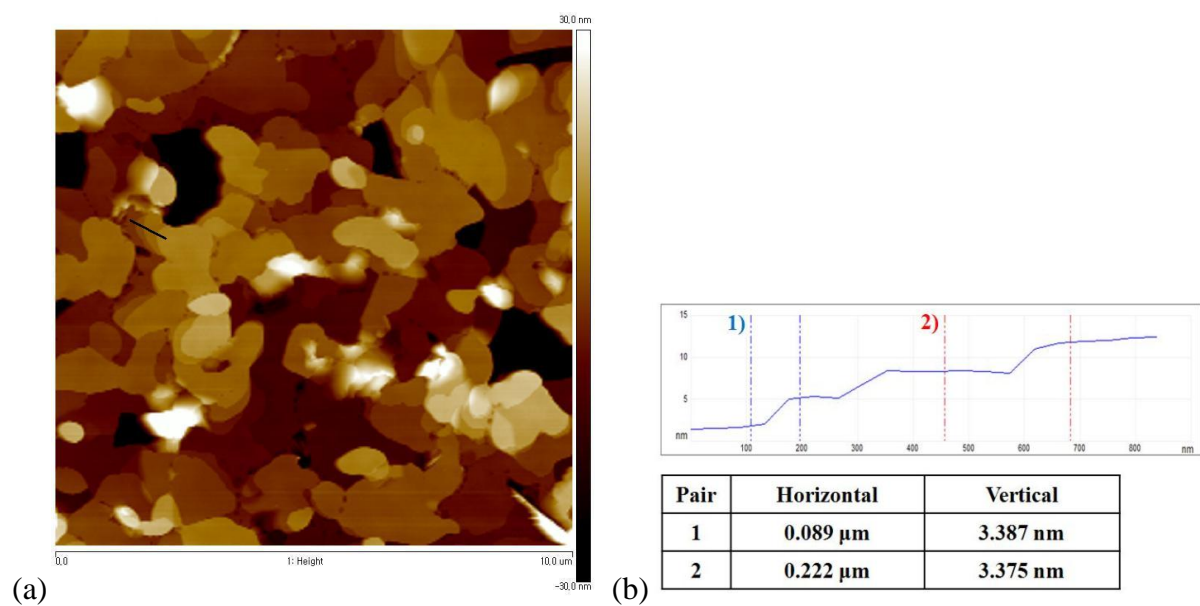

**Fig. S3** AFM images of the C<sub>10</sub>-BTBT layer on KPI.

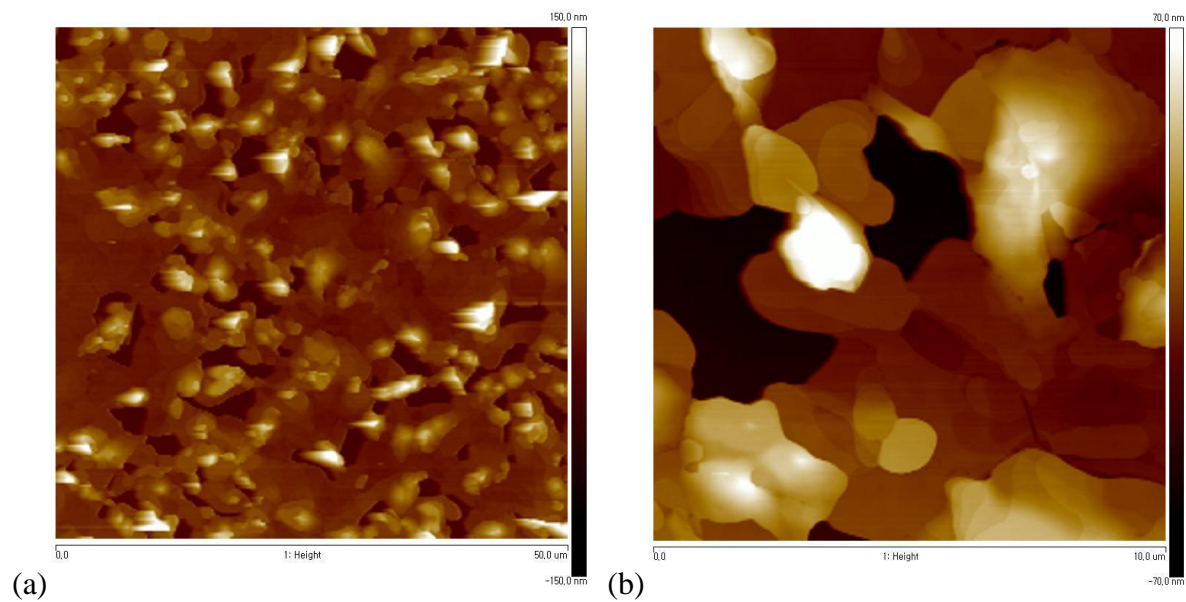

Supplement: c2cp43529b.pdf [file c2cp43529b.pdf]
